# Supplementary material for: Middle ear microbiome differences in indigenous Filipinos with chronic otitis media due to a duplication in the A2ML1 gene
Source: PubMed Central journal article supplement (PMC5088646; doi:10.1186/s40249-016-0189-7), 2016-11-01

# Middle Ear

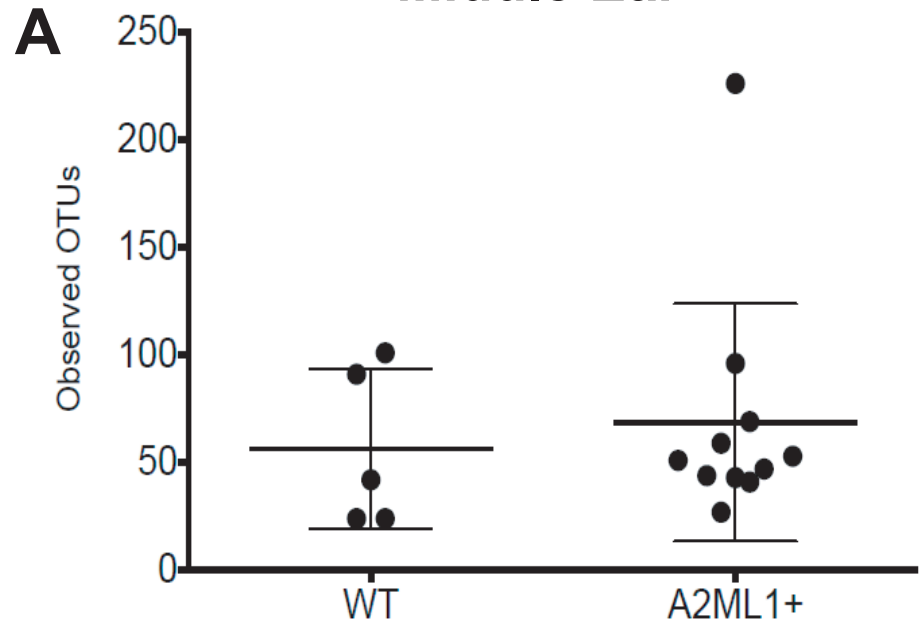

$p=0.4924$ , Mann-Whitney

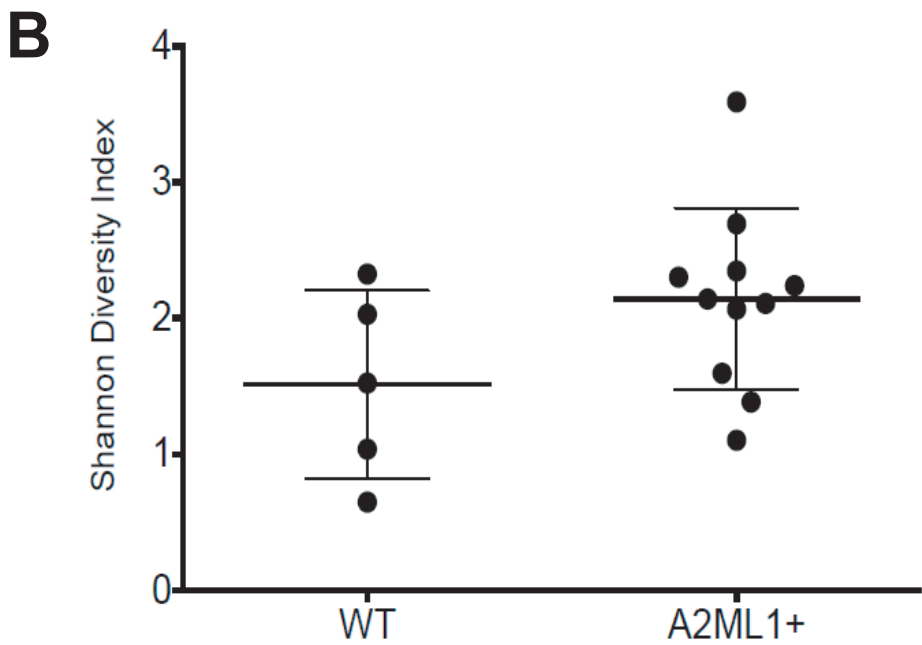

$p=0.1149$ , Mann-Whitney

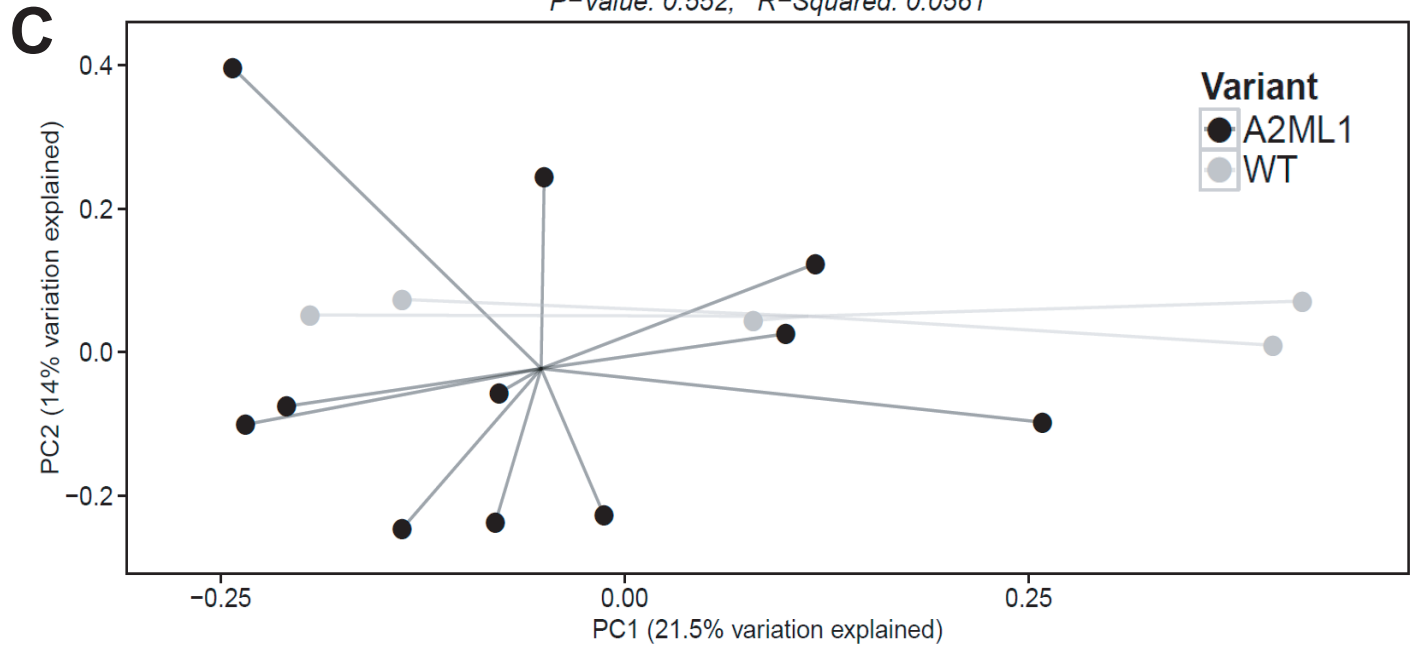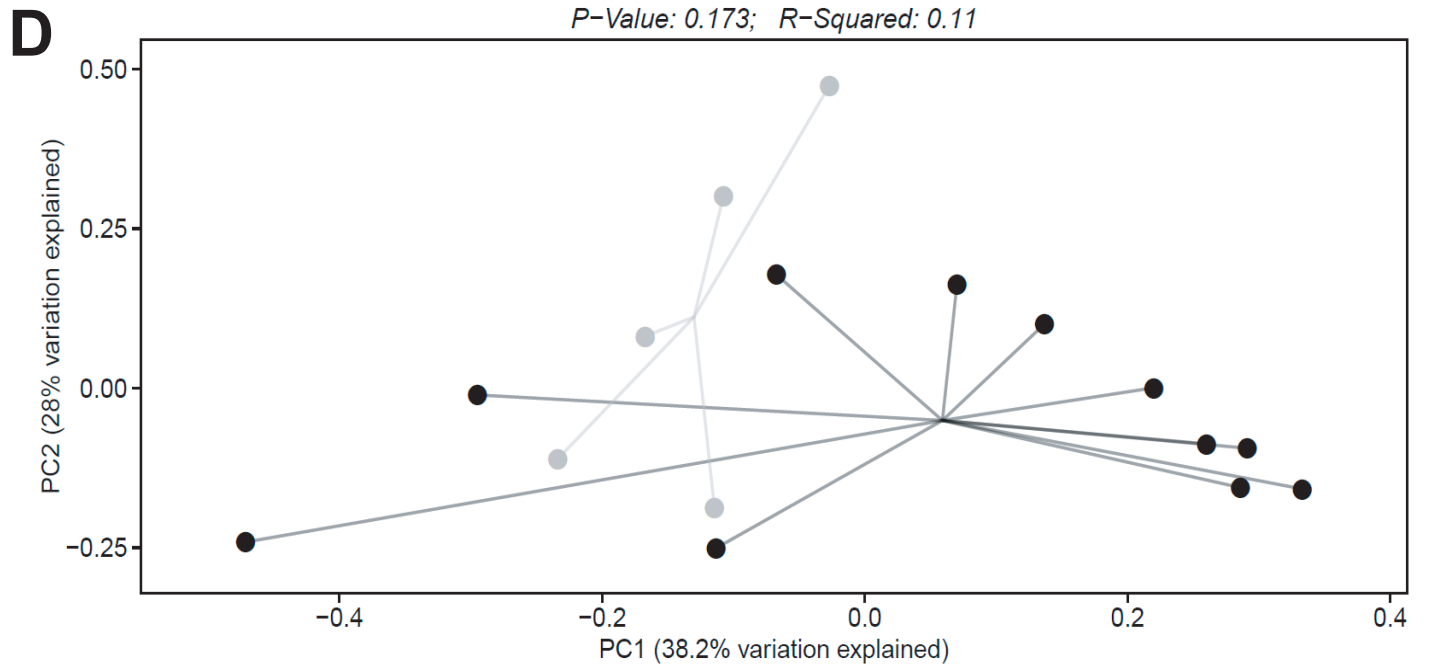

Supplement: 40249_2016_189_MOESM2_ESM.pdf [file 40249_2016_189_MOESM2_ESM.pdf]
