# Supplementary material for: Middle ear microbiome differences in indigenous Filipinos with chronic otitis media due to a duplication in the A2ML1 gene
Source: PubMed Central journal article supplement (PMC5088646; doi:10.1186/s40249-016-0189-7), 2016-11-01
Supplement: 40249_2016_189_MOESM3_ESM.pdf [file 40249_2016_189_MOESM3_ESM.pdf]

**Top 10 Most Abundant Phylum in Middle Ear**

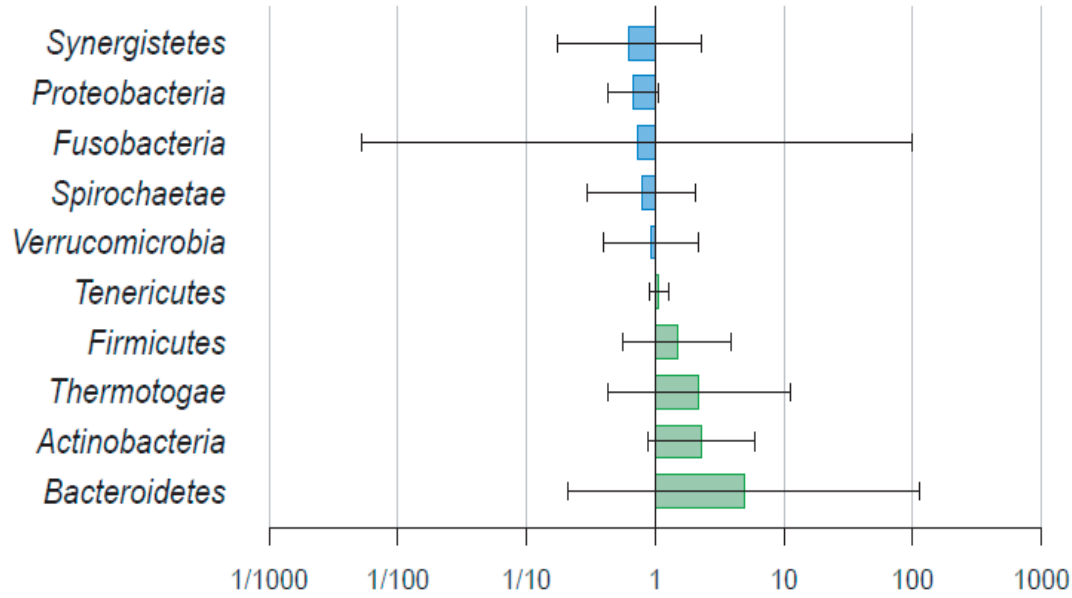

**Top 10 Most Abundant Phylum in Outer Ear**

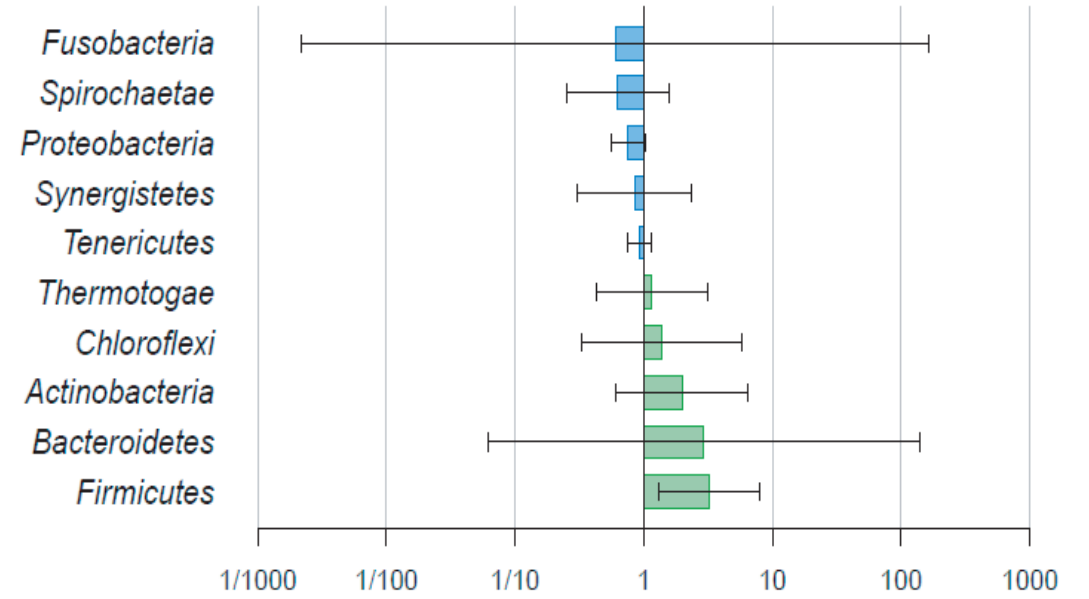

**Top 10 Most Abundant Genus in Middle Ear**

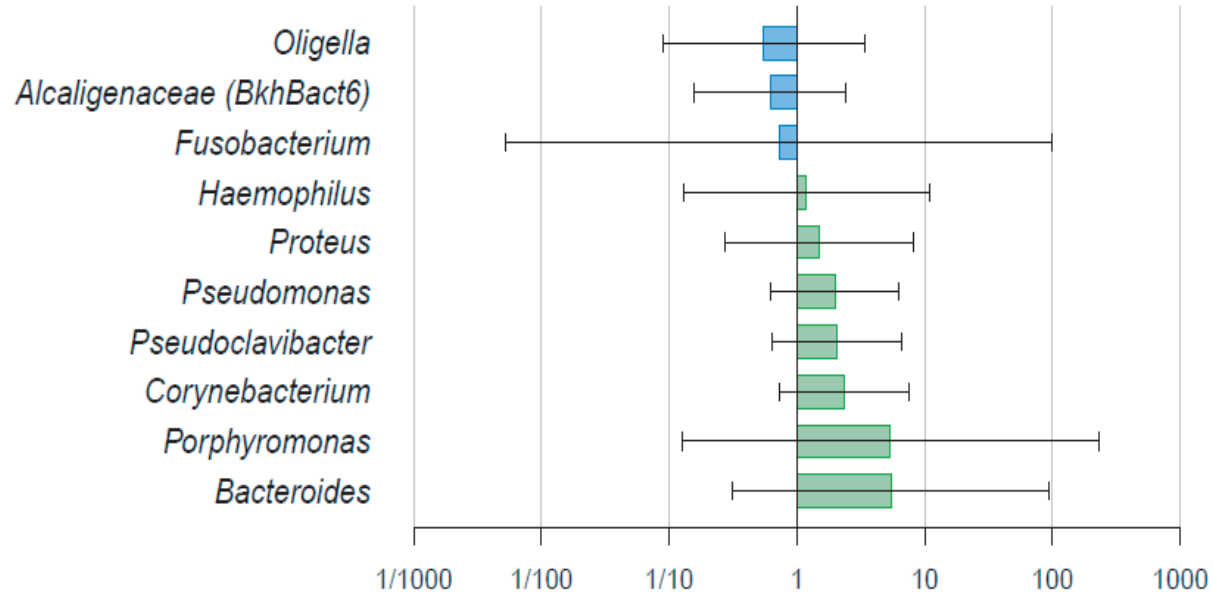

**Top 10 Most Abundant Genus in Outer Ear**

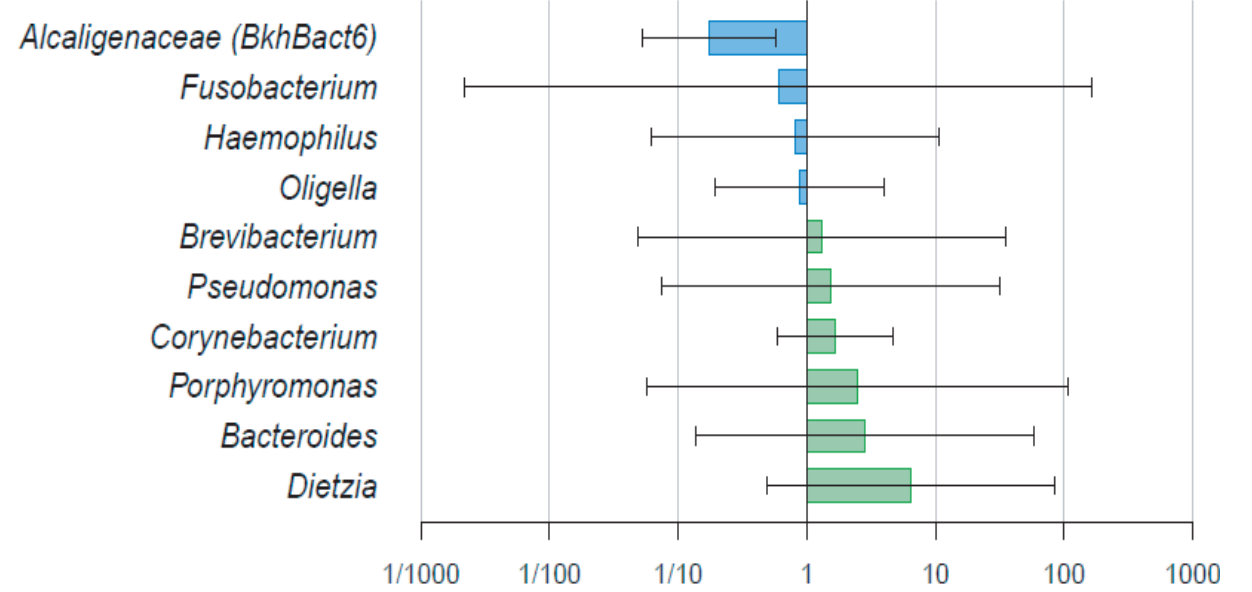

Fold Increase in Left Ear Samples Over Right Ear Samples
